# Supplementary material for: EASL–EASD–EASO Clinical Practice Guidelines on the management of metabolic dysfunction-associated steatotic liver disease (MASLD): Executive Summary
Source: Springer Nature journal article supplement (doi:10.1007/s00125-024-06196-3), 2024-06-13
Supplement: MOESM1 [file 125_2024_6196_MOESM1_ESM.pdf]

# **EASL–EASD–EASO Clinical Practice Guidelines on the management of metabolic dysfunction-associated steatotic liver disease (MASLD): Executive Summary**

European Association for the Study of the Liver, European Association for the Study  
of Diabetes and European Association for the Study of Obesity

\*Clinical Practice Guideline Panel: chair: Frank Tacke; Assistant to Chair: Paul Horn;  
EASL panel members: Vincent Wai-Sun Wong, Vlad Ratziu, Elisabetta Bugianesi,  
Sven Francque, Shira Zelber-Sagi; EASL Governing Board representative: Luca  
Valenti; EASD co-chair: Michael Roden; EASD panel members: Fritz Schick,  
Hannele Yki-Järvinen, Amalia Gastaldelli; EASO co-chair: Roberto Vettor; EASO  
panel members: Gema Frühbeck, Dror Dicker

Corresponding author: European Association for the Study of Diabetes (EASD), email:  
[info@easd.org](mailto:info@easd.org)

## Table of content:

|                                                                                                                                                                                                                                                     |   |
|-----------------------------------------------------------------------------------------------------------------------------------------------------------------------------------------------------------------------------------------------------|---|
| ESM Table 1. Grades of recommendation .....                                                                                                                                                                                                         | 3 |
| ESM Table 2. Level of Evidence based on the Oxford Centre for Evidence-based Medicine (adapted). .....                                                                                                                                              | 3 |
| ESM Table 3. Cardiometabolic risk factors in the definition of MASLD (1).....                                                                                                                                                                       | 3 |
| ESM Table 4. SLD due to aetiologies other than MASLD, MetALD or ALD. ....                                                                                                                                                                           | 4 |
| ESM Table 5. Tools to quantify alcohol consumption and identify alcohol use disorders .....                                                                                                                                                         | 5 |
| ESM Table 6. Factors associated with a higher risk of HCC occurrence in non-cirrhotic MASLD. ....                                                                                                                                                   | 5 |
| ESM Table 7. Proposed tools for HCC risk-stratification in MASLD-related cirrhosis. ....                                                                                                                                                            | 6 |
| ESM Table 8. Summary of protein, energy, and dietary pattern recommendations for adults with cirrhosis as indicated by medical associations' Practice Guidance/ Guidelines. In addition, individuals with cirrhosis must abstain from alcohol. .... | 7 |
| ESM Table 9. Screening and management for comorbidities in individuals with MASLD before liver transplantation. Modified from (2, 3). ....                                                                                                          | 8 |
| References .....                                                                                                                                                                                                                                    | 9 |

**ESM Table 1. Grades of recommendation.**

| Grade        | Wording                                                                          | Criteria                                                                                                       |
|--------------|----------------------------------------------------------------------------------|----------------------------------------------------------------------------------------------------------------|
| Strong       | Must, shall, should, is recommended<br>Shall not, should not, is not recommended | Evidence, consistency of studies, risk-benefit ratio, individual preferences, ethical obligations, feasibility |
| Weak or open | Can, may, is suggested<br>May not, is not suggested                              |                                                                                                                |

**ESM Table 2. Level of Evidence based on the Oxford Centre for Evidence-based Medicine (adapted).**

| Level | Criteria                                                                                                                                                                    | Simple model for high, intermediate and low evidence                                                                                           |
|-------|-----------------------------------------------------------------------------------------------------------------------------------------------------------------------------|------------------------------------------------------------------------------------------------------------------------------------------------|
| 1     | Systematic Reviews (SR) (with homogeneity) of randomised controlled trials (RCT)                                                                                            | Further research is unlikely to change our confidence in the estimate of benefit and risk.                                                     |
| 2     | Randomised controlled trials (RCT) or observational studies with dramatic effects;<br>Systematic Reviews (SR) of lower quality studies (i.e. non-randomised, retrospective) |                                                                                                                                                |
| 3     | Non-randomised controlled cohort/follow-up study/control arm of randomised trial (systematic review is generally better than an individual study)                           | Further research (if performed) is likely to have an impact on our confidence in the estimate of benefit and risk and may change the estimate. |
| 4     | Case-series, case-control, or historically controlled studies (systematic review is generally better than an individual study)                                              |                                                                                                                                                |
| 5     | Expert opinion (mechanism-based reasoning)                                                                                                                                  | Any estimate of effect is uncertain.                                                                                                           |

\*Level may be graded down based on study quality, imprecision, indirectness (study does not match questions), because of inconsistency between studies, or because the absolute effect size is very small; Level may be graded up if there is a large or very large effect size.

**ESM Table 3. Cardiometabolic risk factors in the definition of MASLD (1).**

| Metabolic risk factor           | Adult criteria                                                                                                                                                                                                                                                                                                                                                                                                                          |
|---------------------------------|-----------------------------------------------------------------------------------------------------------------------------------------------------------------------------------------------------------------------------------------------------------------------------------------------------------------------------------------------------------------------------------------------------------------------------------------|
| Overweight or obesity           | Body mass index<br>≥25 kg/m <sup>2</sup> (≥23 kg/m <sup>2</sup> in people of Asian ethnicity)                                                                                                                                                                                                                                                                                                                                           |
|                                 | Waist circumference<br>≥94 cm in men and ≥80 cm in women (Europeans)<br>≥90 cm in men and ≥80 cm in women (South Asians and Chinese)<br>≥85 cm in men and ≥90 cm in women (Japanese)                                                                                                                                                                                                                                                    |
| Dysglycaemia or type 2 diabetes | <u>Prediabetes</u> : HbA <sub>1c</sub> 39-47 mmol/mol (5.7-6.4%) or fasting plasma glucose 5.6-6.9 mmol/L (100-125 mg/dl) or 2-h plasma glucose during OGTT 7.8-11 mmol/L (140-199 mg/dl) <i>or</i><br><u>Type 2 diabetes</u> : HbA <sub>1c</sub> ≥48 mmol/mol (≥6.5%) or fasting plasma glucose ≥7.0 mmol/L (≥126 mg/dl) or 2-h plasma glucose during OGTT ≥11.1 mmol/L (≥200 mg/dl) <i>or</i><br><u>Treatment for type 2 diabetes</u> |
| Plasma triglycerides            | ≥1.7 mmol/L (≥150 mg/dl) <i>or</i><br>lipid-lowering treatment                                                                                                                                                                                                                                                                                                                                                                          |
| HDL-cholesterol                 | ≤1.0 mmol/L (≤39 mg/dl) in men and ≤1.3 mmol/L (≤50 mg/dl) in women <i>or</i><br>lipid-lowering treatment                                                                                                                                                                                                                                                                                                                               |
| Blood pressure                  | ≥130/85 mmHg <i>or</i> treatment for hypertension                                                                                                                                                                                                                                                                                                                                                                                       |

HbA<sub>1c</sub>, glycated haemoglobin; HDL, high-density lipoprotein; OGTT, oral glucose tolerance test

**ESM Table 4. SLD due to aetiologies other than MASLD, MetALD or ALD.**

| Condition                                                               | Clinical/lab/histological findings                                                                                                              | Diagnostic criteria                                                                                                                                                                                                                                                                          |
|-------------------------------------------------------------------------|-------------------------------------------------------------------------------------------------------------------------------------------------|----------------------------------------------------------------------------------------------------------------------------------------------------------------------------------------------------------------------------------------------------------------------------------------------|
| Hepatitis C virus-associated steatotic liver (genotype 3)               | Low triglycerides, HCV genotype 3                                                                                                               | HCV antibody with reflex testing HCV RNA and HCV genotype                                                                                                                                                                                                                                    |
| Drug-induced Liver Disease (DILI)                                       | Mostly microvesicular SLD                                                                                                                       | Investigate for drug intake: <ul style="list-style-type: none"> <li>• Corticosteroids</li> <li>• Tamoxifen</li> <li>• Amiodarone</li> <li>• Irinotecan</li> <li>• Methotrexate</li> <li>• Lomitapide</li> <li>• Valproate</li> <li>• 5-Fluorouracil</li> </ul> Liver biopsy for confirmation |
| Hypobetalipoproteinaemia                                                | Low triglycerides and cholesterol, fat malabsorption, vitamin A deficiency                                                                      | ApoB level, genetic testing ( <i>APOB</i> , <i>MTTP</i> , <i>PCSK-9</i> , targeted panel sequencing)                                                                                                                                                                                         |
| Lipodystrophy                                                           | Accumulation of fat in the visceral area and in the muscle (generically inherited or induced by HAART therapy)                                  | CT scan or MRI, targeted panel sequencing for congenital lipodystrophies, MRI                                                                                                                                                                                                                |
| LAL deficiency (Wolman disease, cholesteryl ester storage disease-CESD) | Elevated LDL-C and triglycerides, low HDL-C, hypersplenism, advanced fibrosis in young age, predominately microvesicular steatosis              | Enzyme assay, genetic testing (LIPA)                                                                                                                                                                                                                                                         |
| Pregnancy associated                                                    | HELLP syndrome<br>Acute onset                                                                                                                   | Elevated liver enzymes and low platelets, haemolysis, SLD at abdominal ultrasound                                                                                                                                                                                                            |
| Wilson disease                                                          | Younger age, neuropsychiatric symptoms, low ceruloplasmin                                                                                       | 24-h urine copper excretion; quantitative copper on liver biopsy, genetic testing ( <i>ATP7B</i> )                                                                                                                                                                                           |
| Nutrient deficiency / malnutrition                                      | Parenteral nutrition, bypass surgeries, bariatric surgery, anorexia                                                                             | Nutrient levels                                                                                                                                                                                                                                                                              |
| Celiac disease                                                          | Diarrhoea, iron deficiency, vitamins deficiency                                                                                                 | Tissue transglutaminase IgA, duodenal biopsy                                                                                                                                                                                                                                                 |
| Endocrine diseases                                                      | Hypothyroidism, PCOS, growth hormone (GH) deficiency, panhypopituitarism (primary or secondary)                                                 | TSH, fT4, fT3, endocrine testing                                                                                                                                                                                                                                                             |
| Other inherited metabolic conditions                                    | Early age and severe onset, absence of triggering factors, systemic involvement, positive history of advanced disease in first degree relatives | Targeted panel sequencing, whole exome sequencing (WES)                                                                                                                                                                                                                                      |

ALD, alcohol-related liver disease; ApoB, apolipoprotein B; fT3, free triiodothyronine; fT4, free thyroxine; HCV, hepatitis C virus; HAART, highly active antiretroviral therapy; HELLP, haemolysis, elevated liver enzymes and low platelets; LAL, lysosomal acid lipase; MASLD, metabolic dysfunction-associated steatotic liver disease; PCOS, polycystic ovary syndrome; SLD, steatotic liver disease; TSH, thyroid-stimulating hormone.

**ESM Table 5. Tools to quantify alcohol consumption and identify alcohol use disorders.**

| Psychometric instruments                                                                                                                                                                                                                                                                                                                                                                                                                                                   | Biomarkers                                                                                                                                                                                                                                                                                                                                                                                       |
|----------------------------------------------------------------------------------------------------------------------------------------------------------------------------------------------------------------------------------------------------------------------------------------------------------------------------------------------------------------------------------------------------------------------------------------------------------------------------|--------------------------------------------------------------------------------------------------------------------------------------------------------------------------------------------------------------------------------------------------------------------------------------------------------------------------------------------------------------------------------------------------|
| <ul style="list-style-type: none"> <li>• Medical history (including current and prior alcohol intake and drinking pattern)</li> <li>• Quantity frequency questionnaires and diaries (Timeline Followback)</li> <li>• Apps (e.g. Drinkaware)</li> <li>• AUDIT (Alcohol Use Disorders Inventory Test) questionnaire – 10 questions</li> <li>• AUDIT-C (shortened version, 3 questions)</li> <li>• SIAC (Systematic Inventory of Alcohol consumption, 3 questions)</li> </ul> | <p>Indirect alcohol markers:</p> <ul style="list-style-type: none"> <li>• GGT, AST, AST&gt;ALT, MCV, %CDT</li> </ul> <p>Direct alcohol markers:</p> <ul style="list-style-type: none"> <li>• Alcohol (EtOH) in breath and/or serum</li> <li>• Ethyl glucuronide (in urine or hair)</li> <li>• Phosphatidylethanol</li> <li>• Less established: ethyl sulfate, fatty acid ethyl esters</li> </ul> |

AST/ALT, aspartate/alanine aminotransferase; CDT, carbohydrate-deficient transferrin; GGT, gamma-glutamyltransferase; MCV, mean corpuscular volume.

**ESM Table 6. Factors associated with a higher risk of HCC occurrence in non-cirrhotic MASLD.**

| Factor(s)                                                           |
|---------------------------------------------------------------------|
| Presence and duration of T2D, obesity or both                       |
| Older age                                                           |
| Concurrent alcohol intake and/or smoking                            |
| Individuals with FIB-4 >3.25                                        |
| Individuals with LSM >10 kPa and increasing change in LSM over time |

**ESM Table 7. Proposed tools for HCC risk-stratification in MASLD-related cirrhosis.**

| NITs            | Formula/model variables/data                                                                                                                                                                                                                                                                                                                                                                                                                                                                                                                      | Study cohorts                                                                                                                                                                                                                          | Performance                                                                                                                      |
|-----------------|---------------------------------------------------------------------------------------------------------------------------------------------------------------------------------------------------------------------------------------------------------------------------------------------------------------------------------------------------------------------------------------------------------------------------------------------------------------------------------------------------------------------------------------------------|----------------------------------------------------------------------------------------------------------------------------------------------------------------------------------------------------------------------------------------|----------------------------------------------------------------------------------------------------------------------------------|
| HCC risk score  | age + sex + platelet count + albumin + AST/ALT available at: <a href="http://www.hccrisk.com">www.hccrisk.com</a>                                                                                                                                                                                                                                                                                                                                                                                                                                 | 7,068 individuals with MASLD-related cirrhosis (407 incident HCC)<br>Mean FU: 3.7 years                                                                                                                                                | Derivation cohort, C-index = 0.749<br>Validation cohort, C-index = 0.718                                                         |
| aMAP            | $(0.06 \times \text{age (years)} + 0.89 \times \text{sex (M = 1; F = 0)} + 0.48 \times [(\log_{10} \text{ bilirubin } (\mu\text{mol/L}) \times 0.66 + \text{albumin (g/L)} \times -0.085] - 0.01 \times \text{platelets } (\times 10^3/\text{mm}^3) + 7.4) / 14.77 \times 100$                                                                                                                                                                                                                                                                    | Overall individuals, n = 17,374 NVH validation cohort, n = 720<br><br>Total: 1,389 individuals with MASLD<br>Median FU: 4.61 years<br>F3-F4, n = 243 (17.5%)                                                                           | NHV cohort:<br>Overall, C-index = 0.85 Cirrhosis, C-index = 0.61<br><br>Overall, C-index = 0.887 F3-F4, C-index = 0.754          |
| GALAD           | $-10.08 + 0.09 \times \text{age (years)} + 1.67 \times \text{gender (M = 1, F = 0)} + 2.34 \times \log_{10} \text{ AFP (ng/ml)} + 0.04 \times \text{AFP-L3 } (\%) + 1.33 \times \log_{10} \text{ DCP (ng/ml)}$                                                                                                                                                                                                                                                                                                                                    | 389 individuals with MASH (28 incident HCC)<br>Median FU: 167 months Cirrhosis, n = 77 (19.6%)                                                                                                                                         | Higher GALAD score in individuals who developed HCC vs. individuals HCC-free as early as 1.5 years before HCC diagnosis          |
| HEDS study      | Risk factor associated to HCC development in individuals with cirrhosis:<br>Male gender (OR = 2.47; 95% CI 1.54–4.07; $p < 0.001$ )<br>Years with cirrhosis (OR = 1.06; 95% CI 1.02–1.1; $p = 0.004$ ),<br>Family h/o of liver cancer (OR = 2.69; 95% CI 1.11–5.86; $p = 0.02$ )<br>Age (OR = 1.17; 95% CI 1.03–1.33; $p = 0.02$ )<br>Obesity (OR = 1.7; 95% CI, 1.08–2.73; $p = 0.02$ )<br>AST (OR = 1.54; 95% CI 0.97–2.42; $p = 0.06$ )<br>AFP (OR = 1.32; 95% CI 0.97–1.77; $p = 0.07$ )<br>Albumin (OR = 0.7; 95% CI 0.46–1.07; $p = 0.10$ ) | Total: 1,325 individuals with cirrhosis (95 incident HCC)<br>Median FU: 2.2 years<br>MASLD, n = 327 (24.9%); 19 incident HCC                                                                                                           | Performance of the multivariate set of risk factors: C-index = 0.73                                                              |
| THRI            | age + etiology + gender + platelets<br>Age: <45 years = 0 points; 45–60 years, 50 points; >60 years, 100 points<br>Etiology: autoimmune/HCV SVR, 0 points; other, 36 points; MASLD, 54 points; HCV/HBV, 97 points Gender: Female = 0 points; Male = 80 points<br>Platelets: >200 = 0 points; 140–200 = 20 points; 80–130 = 70 points; <80 = 89 points<br>Total: 0–366 points                                                                                                                                                                      | Derivation cohort: 2,079 individuals with cirrhosis<br>MASLD, n = 111 (5.3%)<br><br>Total: 2,491 individuals with cirrhosis<br>MASLD, n = 1,182 (48%)                                                                                  | 10-year HCC incidence: low-risk (<120) = 3%;<br>medium-risk (120–240) = 10%<br>high-risk (>240) = 32%<br><br>C-index = 0.69      |
| LiverRisk score | Linear regression model using age (years), blood glucose, cholesterol, AST, ALT, GGT and platelets<br><br>Available at: <a href="https://www.liverriskscore.com">https://www.liverriskscore.com</a>                                                                                                                                                                                                                                                                                                                                               | Derivation cohort: 14,726 participants without known liver disease from the general population undergoing transient elastography for assessment of liver fibrosis.<br><br>Two external validation cohorts: 4,370 and 3,999 individuals | 8-year risk of HCC in the high-risk group = 4.4%<br><br>8-year risk of HCC development in the two lower risk groups $\leq 0.1\%$ |

AFP, alpha-fetoprotein; DCP, Des-γ-carboxy prothrombin; FU, follow-up; OR, odds ratio.

**ESM Table 8. Summary of protein, energy, and dietary pattern recommendations for adults with cirrhosis as indicated by medical associations' Practice Guidance/ Guidelines. In addition, individuals with cirrhosis must abstain from alcohol.**

| Society/<br>Association                    | EASL 2019                                                                                                                      |                                                                      | ESPEN 2019 and joint ESPEN/UEG<br>guideline 2023                                                                                 |                                                                                                                                                                                                                                                                                                                                                                                   | AASLD 2021                                                                                                                                                                     |                                                                                                                                                                                                                                                                                                                                      |
|--------------------------------------------|--------------------------------------------------------------------------------------------------------------------------------|----------------------------------------------------------------------|----------------------------------------------------------------------------------------------------------------------------------|-----------------------------------------------------------------------------------------------------------------------------------------------------------------------------------------------------------------------------------------------------------------------------------------------------------------------------------------------------------------------------------|--------------------------------------------------------------------------------------------------------------------------------------------------------------------------------|--------------------------------------------------------------------------------------------------------------------------------------------------------------------------------------------------------------------------------------------------------------------------------------------------------------------------------------|
| BMI<br>status <sup>†</sup>                 | Mixed BMIs                                                                                                                     | Obese BMI >30<br>kg/m <sup>2</sup> )                                 | Mixed BMIs                                                                                                                       | Obese (BMI >30<br>kg/m <sup>2</sup> )                                                                                                                                                                                                                                                                                                                                             | Non-obese                                                                                                                                                                      | Obese (non-<br>hospitalised, clinically<br>stable)                                                                                                                                                                                                                                                                                   |
| Daily energy                               | 35 kcal/kg<br>actual BW (in<br>nonobese<br>individuals)                                                                        | >5–10% WR,<br>moderately<br>hypocaloric<br>diet (~500–800<br>kcal/d) | 30-35 kcal/kg only<br>for DC.<br>Regular energy<br>requirements in CC                                                            | WR.<br>No need for<br>increased energy<br>intake                                                                                                                                                                                                                                                                                                                                  | ≥35 kcal/kg<br>body<br>weight/day                                                                                                                                              | 25-35 kcal/kg/day for<br>individuals with BMI 30-<br>40 kg/m <sup>2</sup> , and 20-25<br>kcal/kg/day for<br>individuals with BMI ≥40<br>kg/m <sup>2</sup> .<br>WR if medically required,<br>under the supervision of<br>a multidisciplinary team.<br>Caution applied to<br>prescribing weight loss<br>in decompensated<br>cirrhosis. |
| Daily protein                              | 1.2–1.5 g/kg<br>actual BW                                                                                                      | >1.5 g /<br>kg IBW                                                   | 1.2 g/kg (for non-<br>malnourished<br>individuals with CC)<br>to 1.5 g/kg (to<br>malnourished<br>and/or sarcopenic<br>cirrhosis) | Individuals with<br>overweight or obesity<br>and compensated<br>cirrhosis: 1.2 g/kg<br>ABW/d.<br>Individuals with<br>overweight or<br>obesity and<br>compensated<br>cirrhosis undergoing<br>weight-loss programs:<br>1.2–1.5 g/kg ABW/d.<br>Individuals with<br>overweight or<br>obesity and<br>compensated<br>cirrhosis and<br>malnutrition or<br>sarcopenia: 1.5 g/kg<br>ABW/d. | 1.2-1.5 g/kg<br>IBW.<br>For<br>individuals<br>with cirrhosis<br>who are<br>critically ill, a<br>target of 1.2-<br>2.0 g/kg IBW                                                 | Intake of target protein<br>(1.2-1.5 g/kg/day) and<br>physical activity are<br>required to reduce the<br>loss of muscle<br>contractile function and<br>muscle mass that can<br>occur with weight loss.                                                                                                                               |
| Meal patterns                              | Split food intake into 3 main<br>meals and 3 snacks                                                                            |                                                                      | Three to five meals a day and a late evening<br>snack                                                                            |                                                                                                                                                                                                                                                                                                                                                                                   | Maximum interval of 3-4 hours between<br>nutritional intake while awake.<br>To minimise nocturnal fasting time, an<br>early breakfast and/or late-evening snack<br>recommended |                                                                                                                                                                                                                                                                                                                                      |
| Dietary<br>protein source<br>in case of HE | Individuals may tolerate animal<br>protein (meat) less well than<br>vegetable protein (beans, peas<br>etc.) and dairy proteins |                                                                      | In individuals who are protein "intolerant",<br>vegetable proteins should be used                                                |                                                                                                                                                                                                                                                                                                                                                                                   | A diverse range of protein sources,<br>including vegetable and dairy products,<br>should be encouraged.                                                                        |                                                                                                                                                                                                                                                                                                                                      |

ABW, adjusted body weight; BMI, body mass index; CC, compensated cirrhosis; DC, decompensated cirrhosis; HE, hepatic encephalopathy; IBW, ideal body weight; WR, weight reduction.

ABW = reference body weight (in which BMI = 25) + 0.33\*(actual body weight - reference body weight).

<sup>†</sup>In a case of fluid retention, body weight should be corrected by evaluating the individual's dry weight.

**ESM Table 9. Screening and management for comorbidities in individuals with MASLD before liver transplantation.** Modified from (2, 3).

| Condition       | Recommendation                                                                                                                                                                                                                                                                                                                                                                                                                                             |
|-----------------|------------------------------------------------------------------------------------------------------------------------------------------------------------------------------------------------------------------------------------------------------------------------------------------------------------------------------------------------------------------------------------------------------------------------------------------------------------|
| Type 2 diabetes | <ul style="list-style-type: none"> <li>• Screen for impaired fasting glucose (IFG) or glucose tolerance (IGT) and/or T2D (OGTT, HbA<sub>1c</sub>)</li> <li>• Achieve good glycaemic control before LT</li> <li>• Preferentially use weight-lowering (e.g. SGLT2 inhibitors, GLP1RA) or weight-neutral (e.g. metformin) glucose lowering medication, considering risk of other diabetes complications, if liver and/or renal function allow this</li> </ul> |
| Nutrition       | <ul style="list-style-type: none"> <li>• Assess nutritional status before LT</li> <li>• Assess alcohol consumption</li> <li>• Healthy diet, physical exercise and lifestyle modification (including weight reduction in individuals with obesity) represent pillars in pre-LT management</li> </ul>                                                                                                                                                        |
| Cardiovascular  | <ul style="list-style-type: none"> <li>• Pre-LT cardiovascular risk stratification is mandatory</li> <li>• Risk-adapted algorithm of cardiac work-up should be followed (see Fig. 5)</li> <li>• LT candidates with cardiovascular risk should be managed with goal-directed medical management (e.g., statins, anti-platelet agents, beta blockers, RAAS blockers), based on the stage of cirrhosis and renal function</li> </ul>                          |
| Kidney          | <ul style="list-style-type: none"> <li>• Kidney function should be adequately monitored before LT</li> <li>• Comedications need to be adjusted (or replaced) dependent on kidney function</li> </ul>                                                                                                                                                                                                                                                       |
| Malignancies    | <ul style="list-style-type: none"> <li>• Screening for pre-LT malignancies should follow the same protocols applied to individuals with non-MASLD related cirrhosis (including gastrointestinal and genital cancers)</li> </ul>                                                                                                                                                                                                                            |

GLP1RA, glucagon-like peptide-1 receptor agonist; HbA<sub>1c</sub>, glycated haemoglobin; LT, liver transplantation; MASLD, metabolic dysfunction-associated steatotic liver disease; OGTT, oral glucose tolerance test; RAAS, renin-angiotensin-aldosterone system; SGLT2, sodium-glucose cotransporter-2.



## References

1. Rinella ME, Lazarus JV, Ratziu V, Francque SM, Sanyal AJ, Kanwal F, et al. A multi-society Delphi consensus statement on new fatty liver disease nomenclature. *J Hepatol.* 2023;79(6):1542-56.
2. Tsochatzis EA, Watt KD, VanWagner LB, Verna EC, Berzigotti A. Evaluation of recipients with significant comorbidity - Patients with cardiovascular disease. *J Hepatol.* 2023;78(6):1089-104.
3. Burra P, Becchetti C, Germani G. NAFLD and liver transplantation: Disease burden, current management and future challenges. *JHEP Rep.* 2020;2(6):100192.
